# Supplementary material
Source: HighWire-hosted journal article supplement (doi:10.1101/rna.078749.121)
Supplement: Supplemental_Table_S1.xlsx [file Supplemental_Table_S1.xlsx]

## Sheet: 32P-Probe generation - Northern
Probe 1 for detection of HMGXB3 mRNA
Primer 1 - Forward	CAG AGG TGA TTG AGC AGG TGG
T7-Primer 2 - Reverse	TTAATACGACTCACTATAGGG CGT AGA GGG CCA ACA AGG AGA
Probe 2 for detection of HMGXB3 mRNA with 3'end extension
Primer 1 - Forward	TGC CTT CTA GCC CAG AAT GAC G
T7-Primer 2 - Reverse	TTAATACGACTCACTATAGGG TCA GGG GAG GTC AGA GGA TCC
Probe 3 for detection of c-fms mRNA
Primer 1 - Forward	TCT GGG CAA GGA GGA TGC TGT C
T7-Primer 2 - Reverse	TTAATACGACTCACTATAGGG CTG GAG AAG CCA CTG TCC CTG C
Probe 4 for detection of c-fms mRNA with 3'end extension
Primer 1 - Forward	GTC ATG ACC AGG GAC CAC ATC C
T7-Primer 2 - Reverse	TTAATACGACTCACTATAGGG TGC GGT GTG GGT CAG GGT GGA G

## Sheet: 3'end Mapping
Mapping for HMGXB3 mRNA 3'end extension
Rverse transcription primer 1	GGAGTTGACGACAGGGAGTACCAC
Rverse transcription primer 2	ACTTCAACTCCTCCATGGATGG
Rverse transcription primer 3	GCCTTCGGTCATTTCACTCAAC
Rverse transcription primer 4	TCAGAGGATCCCACTTCCTGAG
Rverse transcription primer 5	ATGGGCCATCACTGCCAGTC
Rverse transcription primer 6	GTCAGGGGCTGGGGGCTGAG
Rverse transcription primer 7	TAGTAGAACCTTCTTTCCTAATC
Rverse transcription primer 8	TCCTAATCCCCTTATCTTCATG
Rverse transcription primer 9	ATGGAAATGGACTGACTTTATGCCTA
Rverse transcription primer 10	CTGGTACTGCTGTAATGAGCCAAGTGG
Forward primer in HMGXB3 mRNA 3'end	GTCCCTGGTCATGACATAACCTAGCAGC
*Reverse primers are same with Reverse transcription primers
Mapping for c-fms mRNA 3'end extension
Rverse transcription primer 1	TGTCTATGTGGTAGATATGGCC
Rverse transcription primer 2	GCTACCCAGAGCTGACTAACC
Rverse transcription primer 3	TGTGAGTGTGTCCTGCCCAGAG
Rverse transcription primer 4	AAGACTGCCACGCGGCGCATCG
Rverse transcription primer 5	CCTACAGCCCAATCCTGGTGAC
Rverse transcription primer 6	TAAGCCAGGCTGTTGTACAGGGACTACAC
Rverse transcription primer 7	GGTGGGACCCAGGGTCCTCAGTTCTC
Rverse transcription primer 8	ACCAGGAAACCTCTTCTGGCCCCGAG
Forward primer in HMGXB3 mRNA 3'end	AGCCTCACCCCTCCCACCCCCATAC
*Reverse primers are same with Reverse transcription primers

## Sheet: RNA Quantification - qRT-PCR
qRT-PCR for quantification of c-fms mRNA
Rverse transcription RT primer 1 for c-fms mRNA	GAA TGT CCA TAT GAC GCT TAC C
Rverse transcription RT primer 2 for c-fms mRNA with 3'end extension	TAA CTC TAG GGG TCC CTT TGG
Rverse transcription RT primer 3 for GAPDH mRNA	CTA CAT GGC AAC TGT GAG GAG
qPCR primer set 1 for c-fms mRNA
Forward	ACC TCA AAG TCA TGG TGG AGG C
Reverse	GTC AGA GCT CTC CAG CCT CCT G
qPCR primer set 2 for c-fms mRNA with 3'end extension
Forward	CTT GAG CCA GTC CTG CTG TTT CC
Reverse	AGC CAC AGC TCT CTT CCA GCA C
qPCR primer set 3 for GAPDH mRNA
Forward	AAC AGC GAC ACC CAC TCC TCC ACC
Reverse	CCA GCA GTG AGG GTC TCT CTC TTC CTC
qRT-PCR for quantification of HMGXB3 mRNA
Rverse transcription RT primer 4 for HMGXB3 mRNA	CGA CTG GCG TCT TAG TGA CTG CTG
Rverse transcription RT primer 5 for HMGXB3 mRNA with 3'end extension	CTT GGT GTG GCC AGC CAC ATG C
Rverse transcription RT primer 3 for GAPDH mRNA	CTA CAT GGC AAC TGT GAG GAG
qPCR primer set 4
Forward	GTG AGA GTA GCT CCT CTG CAC C	65
Reverse	AGA CGC CAG AAG CCA ATT CCA C
qPCR primer set 5
Forward	GAG GCT GTG GAG TGA AGG CGG C
Reverse	GCC TCG TGT TTG CTA TGC CAA C
qPCR primer set 3 for GAPDH mRNA
Forward	AAC AGC GAC ACC CAC TCC TCC ACC
Reverse	CCA GCA GTG AGG GTC TCT CTC TTC CTC
